# Supplementary material for: Adult Bovine-Derived Small and Large Intestinal Organoids: In Vitro Development and Maintenance
Source: Hindawi journal article supplement (doi:10.1155/2023/3095002), 2023-11-27
Supplement: f1 [file 3095002.f1.pdf]

## Supplementary Materials

**Supplementary Table 1:** Summary of signalment of animals sampled in this study.

| <b>Animal ID</b> | <b>Breed</b>      | <b>Sex</b> | <b>Estimated Age (Months)</b> |
|------------------|-------------------|------------|-------------------------------|
| 1                | Hereford          | MN         | 18                            |
| 2                | Angus x Charolais | MN         | 18                            |
| 3                | Charolais         | MN         | 18                            |
| 4                | Angus             | MN         | 15-18                         |
| 5                | Angus             | F          | 15-18                         |

Animal ID, breed, sex and estimated age in months are listed.

**Supplementary Table 2:** Primary antibodies and fluorescent probes used to characterize bovine intestinal organoids.

| <b>Antibodies/<br/>Fluorescent Probes</b> | <b>Target</b>                          | <b>Host<br/>Species</b> | <b>Dilution</b> | <b>Manufacturer (Catalog No.)</b> |
|-------------------------------------------|----------------------------------------|-------------------------|-----------------|-----------------------------------|
| E-cadherin                                | Adherens junctions                     | Mouse                   | 1:200           | BD Biosciences (560061)           |
| EpCAM                                     | Epithelial cells                       | Rabbit                  | 1:200           | Abcam (ab71916)                   |
| SOX9                                      | Stem cells                             | Rabbit                  | 1:250           | Abcam (ab185966)                  |
| SNA                                       | Lectin binding mucin<br>(Goblet cells) | -                       | 1:100           | Vector Laboratories (FL-1301)     |
| DAPI                                      | Nuclei                                 | -                       | 1:1000          | Thermo Scientific (62248)         |
| Phalloidin                                | Actin filaments                        | -                       | 1:400           | Invitrogen (A22287)               |
| EdU                                       | Actively proliferating<br>cells        | -                       | 5 $\mu$ M       | Invitrogen (C10337)               |

Target, host species, dilution, and manufacturers of each antibody/probe are listed.

**Supplementary Table 3:** Primers used to evaluate gene expression of bovine intestinal organoids.

| Gene Name                                                                 | Gene Type/Marker           | Forward                | Reverse               |
|---------------------------------------------------------------------------|----------------------------|------------------------|-----------------------|
| Glyceraldehyde 3-phosphate dehydrogenase ( <i>GAPDH</i> )                 | Internal Control           | ATCTCGCTCCTGGAAGATG    | TCGGAGTGAACGGATTCCG   |
| Ribosomal protein L0 ( <i>RPL0</i> )                                      | Internal Control           | CAACCCTGAAGTGCTTGACAT  | AGGCAGATGGATCAGCCA    |
| $\beta$ -actin ( <i>ACTB</i> )                                            | Internal Control           | CTAGGCACCAGGGCGTAATG   | CCACACGGAGCTCGTTGTAG  |
| Leucine-rich repeat-containing protein-coupled receptor 5 ( <i>LGR5</i> ) | Stem cell                  | ACTTTCCAGCAGTTGTTTCAGC | GAATAGACGACAGGCGGTTG  |
| Chromogranin A ( <i>ChrA</i> )                                            | Enteroendocrine cell       | GGGACACTGAGGTGATGAAG   | GTCGCAGGATTGAGAGGAT   |
| Lysozyme C ( <i>LyzC</i> )                                                | Paneth cell                | TTCCTTTCTGTTGCTGTCCA   | AGCCATCCAGTCCAAGTTTC  |
| Mucin 2 ( <i>MUC2</i> )                                                   | Goblet cell                | TTCGACGGGAGGAAGTACAC   | TTCACCGTCTGCTCATTTCAG |
| Fatty acid binding protein 2 ( <i>FABP2</i> )                             | Intestinal epithelial cell | GGAGGGAGATAAACTTGTCGG  | ATCTGTGTTCTGGGCAATGC  |

Gene name, types/markers, and forward and reverse sequences are listed.

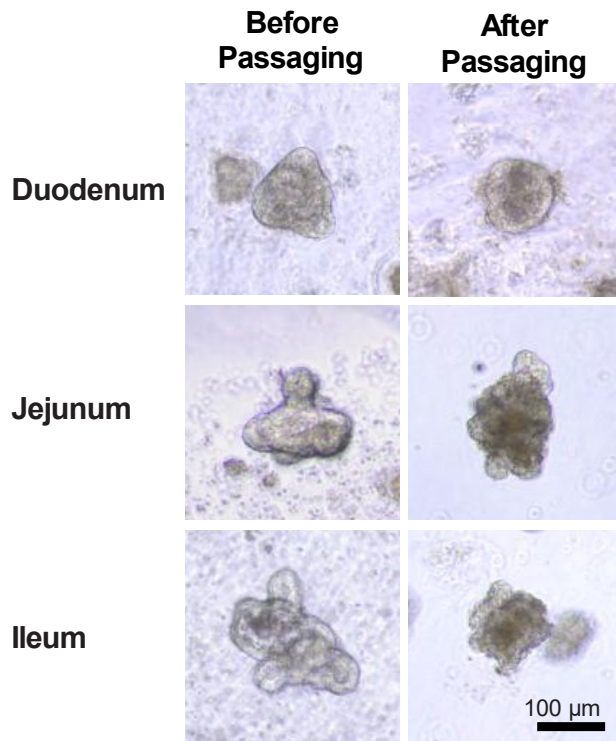

**Supplementary Figure 1:** Representative images of disintegrating bovine intestinal organoids taken with phase-contrast brightfield microscopy. Duodenal, jejunal and ileal organoids derived from some individuals started to disintegrate following routine passaging during early passages. These organoids eventually lost their proliferating capacity and were unable to maintain long-term through serial passages.
